# Supplementary material
Source: Research Square preprint supplement (doi:10.21203/rs.3.rs-9052736/v1)

**Supplementary Information**

| **Table S1**. Group-specific in- and exclusion criteria, across both study phases. | | |
| --- | --- | --- |
| **Groups** | **Inclusion** | **Exclusion** |
| **Optimization phase** |  |  |
| Older adults without mobility impairments | - ≥ 65 years old | - Experiences a limitation in mobility (cfr. International Classification of Functioning, Disability and Health) |
| Chronic stroke survivors | - ≥ 18 years old - ≥ 6 months after stroke - Independent walking: FAC levels 3 (dependent on verbal supervision or the presence of an additional person without physical contact during walking), 4 (independent walking but only on level surfaces) or 5 (independent walking on all surfaces) | - Severe problems with speech or memory which prevents the participant to understand/follow instructions or to provide verbal input - Fully dependent on a key walker or mobility scooter to navigate their life space |
| Older adults with mobility impairments | - ≥ 65 years old - Experiences limitations in mobility (cfr. International Classification of Functioning, Disability and Health) | - Severe problems with speech or memory which prevents the participant to understand/follow instructions or to provide verbal input - Fully dependent on a key walker or mobility scooter to navigate their life space |
| **Validation phase** |  |  |
| Older adults without mobility impairments | - ≥ 65 years old | - Experiences a limitation in mobility (cfr. International Classification of Functioning, Disability and Health) |
| Chronic stroke survivors | - ≥ 18 years old - ≥ 6 months after stroke - FAC levels 3 (dependent on verbal supervision or the presence of an additional person during walking) or 4 (independent walking but only on level surfaces) | - Severe problems with speech or memory which prevents the participant to understand/follow instructions or to provide verbal input - Fully dependent on a key walker or mobility scooter to navigate their life space |
| Older adults with probable sarcopenia | - ≥ 65 years old - Reduced muscle strength:   - 5 times sit-to-stand > 15 seconds (cfr. European Working Group on Sarcopenia in Older People)   - AND, maximal hand grip strength of the dominant hand: < 71 kPa (men) , < 41 kPa (women) (cfr. Belgian Society for Gerontology and Geriatrics) | - Severe problems with speech or memory which prevents the participant to understand/follow instructions or to provide verbal input - Fully dependent on a key walker or mobility scooter to navigate their life space |
| FAC = Functional Ambulation Category; ICF = International Classification of Functioning, Disability and Health. | | |

Figure S1. Detailed floorplan of the final FATIGU’AGE protocol with dimensions in meter.


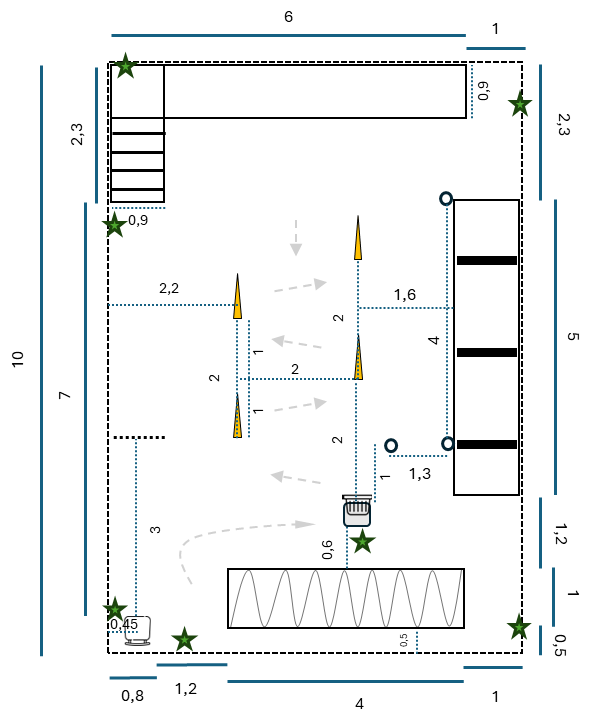

Supplement: Supplementary file 1 [file 5ff1426e987a4a13caa30b48.docx]
